# Supplementary material for: Green synthesis of orthorhombic Mn2O3nanoparticles; influence of the oxygen vacancies on antimicrobial activity and cationic dye degradation
Source: Royal Society of Chemistry journal article supplement (doi:10.1039/d3nj02678g), 2023-01-01
Supplement: d3nj02678g1.pdf [file d3nj02678g1.pdf]

## Supporting information New Journal of Chemistry

# Green synthesis of orthorhombic $\text{Mn}_2\text{O}_3$ nanoparticles; influence of the oxygen vacancies on antimicrobial activities and cationic dye degradation

Prammitha Rajaram <sup>a†</sup>, Ambrose Rejo Jeice <sup>a\*</sup> Kumarasamy Jayakumar <sup>b†</sup>

*<sup>a</sup>Department of Physics and Research Centre, Annai Velankanni College, Tholayavattam - 629157, Kanyakumari District, Tamil Nadu-629157, India, Affiliation to Manonmanium Sundaranar University, Abishekapattai, Tirunelveli - 627 012, Tamilnadu, India.*

*<sup>b</sup>Institute of Functional Materials and Agricultural Applied Chemistry, Jiangxi Agricultural University, Nanchang 330045, P. R. China*

†These authors contributed equally

**\*Corresponding author**

E mail ([rejojeice@gmail.com](mailto:rejojeice@gmail.com).)

Mobile No: +918807841121

## S MATERIALS AND METHODS

### S1 Materials

Manganese (II) acetate tetrahydrate  $[(\text{CH}_3\text{COO})_2\text{Mn}\cdot 4\text{H}_2\text{O}, 99.5\ \%]$ , acetone ( $\text{C}_3\text{H}_6\text{O}$ ), distilled water, and *methylene blue* ( $\text{C}_{16}\text{H}_{18}\text{ClN}_3\text{S}$ ) were obtained by Loba chemicals. All of the compounds were analytical-grade and can be utilized without any other filtration process. *Veldt grape* leaf (scientific name: *Cissus quadrangularis Linn*) was procured from the locality of Marthandam, Tamil Nadu, India. Microbial strains like *Proteus mirabilis* (*P. mirabilis*), *Aeromonas hydrophila* (*A. hydrophila*), and *Aspergillus flavus* (*A. flavus*) were employed to examine biological effects.

### S2 Characterization

The absorption spectra of the as-synthesized  $\text{Mn}_2\text{O}_3$  NPs were examined by a UV-Visible Spectrometer (Perkin Elmer, model-Lambda 35). The crystalline nature and phase structure were examined using an X-Ray Diffractometer (Shimadzu XRD 6000). The chemical composition of the  $\text{Mn}_2\text{O}_3$  NPs was determined through a Fourier Transform Infrared Spectrometer (FTIR) (Perkin Elmer, model-spectrum two). Scanning Electron Microscopy (JEOL, model-JSM-639) and High-Resolution Transmission Electron Microscopy (JEOL, model-JSM 2100) were used to analyze the  $\text{Mn}_2\text{O}_3$  NPs' surface morphology. Utilizing an external scientific instrument known as the X-probe, X-Ray000 400um-FG ON (400 m), X-ray photon spectroscopic was used to study the functional compounds that comprise manganese (Mn 2p), oxygen (O 1s), and carbon (C 1S). As prepared  $\text{Mn}_2\text{O}_3$  NPs' elemental composition has been examined using an X-Ray Energy Dispersive Spectrometer (EDAX). As synthesized samples, Mn-1 to Mn-3 were carried out against microbial pathogens such as *P. mirabilis* (MTCC 425), *A. hydrophila* (MTCC 12301), and *A. flavus* (MTCC 277) utilizing the Kirby-

Bauer disc diffusion approach. To find the photocatalytic activity of the prepared samples, MB dye was used as an organic pollutant.

### S3 Methyl blue dye degradation via a photocatalytic oxidation mechanism

The process of photo-electrocatalytic degradation can be described as follows: under UV irradiation, 10 mg of  $\text{Mn}_2\text{O}_3$ NPs as a catalyst generates oxygen vacancies. Under the influence of an applied optical field, the photogenerated vacancy in the valence band of the  $\text{Mn}_2\text{O}_3$  nanoparticles oxidizes  $\text{OH}^-$  ions as they travel via the linked catalyst particles to the catalyst particle–solution interface. Meanwhile, oxygen vacancies in conduction band photosynthesis are transferred to the substrate's surface in order to emit conductive UV light via catalytic particles. The mechanistic scheme describing the degradation of methylene blue dye by  $\text{Mn}_2\text{O}_3$  is as follows:

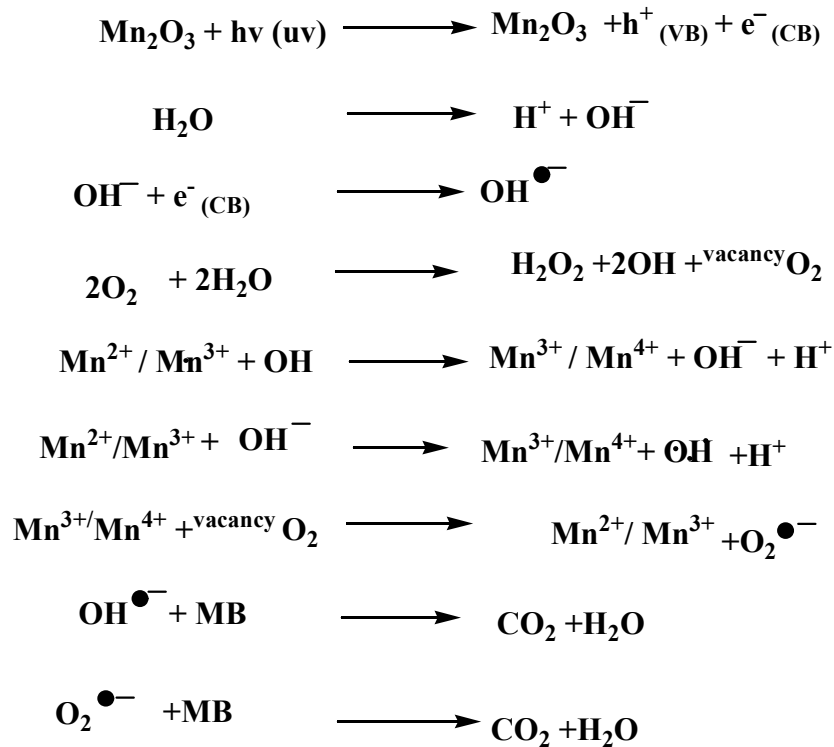

**Table S1: The crystalline size, lattice strain, dislocation density and lattice parameters of the synthesized Mn<sub>2</sub>O<sub>3</sub> NPs**

| Samples code | Precursor concentration (M) | Crystalline size (nm) |
|--------------|-----------------------------|-----------------------|
| Mn-1         | 1                           | 11.23                 |
| Mn-2         | 1.25                        | 10.28                 |
| Mn-3         | 1.5                         | 9.78                  |

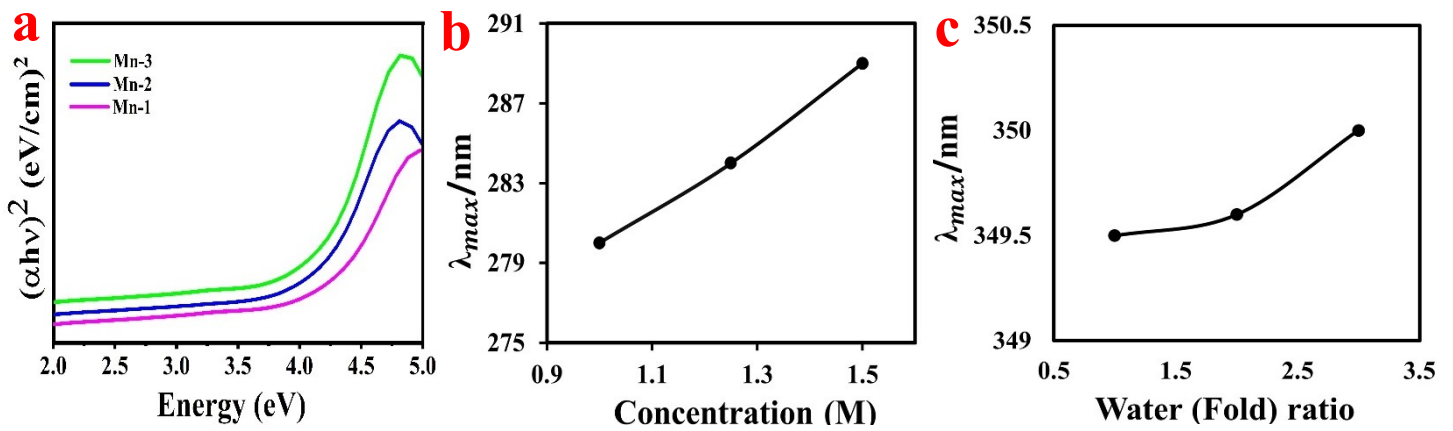

**Fig. S1 (a) Tauc plot, (b) optimization of precursor concentration and (c) dilution of leaf extract**

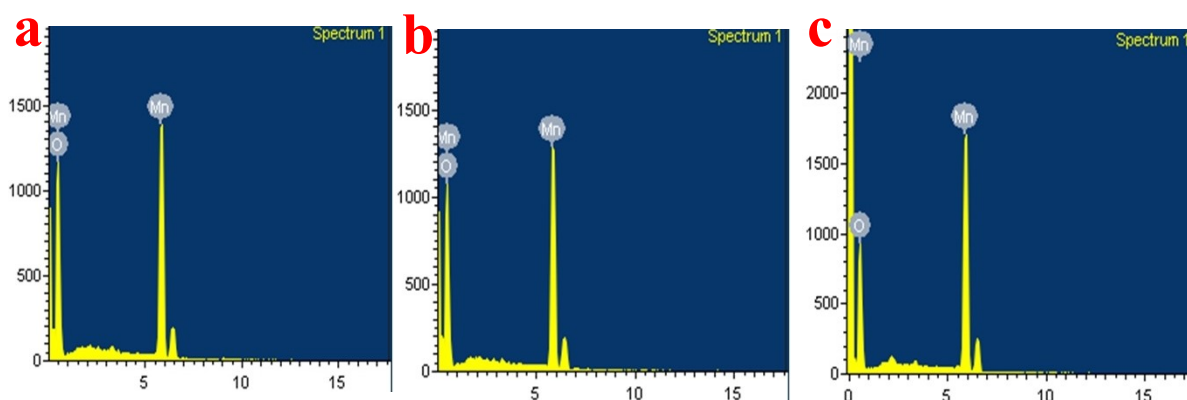

**Fig. S2 EDAX spectra of prepared Mn-1 (a), Mn-2 (b), and Mn-3 (c) samples**

**Table S2: Elemental composition of synthesized Mn<sub>2</sub>O<sub>3</sub> NPs**

| Elements  | Samples code (%) |        |        |        |        |        |
|-----------|------------------|--------|--------|--------|--------|--------|
|           | Mn-1             |        | Mn-2   |        | Mn-3   |        |
|           | Atomic           | Weight | Atomic | Weight | Atomic | Weight |
| <b>Mn</b> | 37.17            | 67.02  | 37.37  | 67.20  | 47.59  | 75.72  |
| <b>O</b>  | 62.83            | 32.98  | 62.63  | 32.80  | 52.41  | 24.28  |

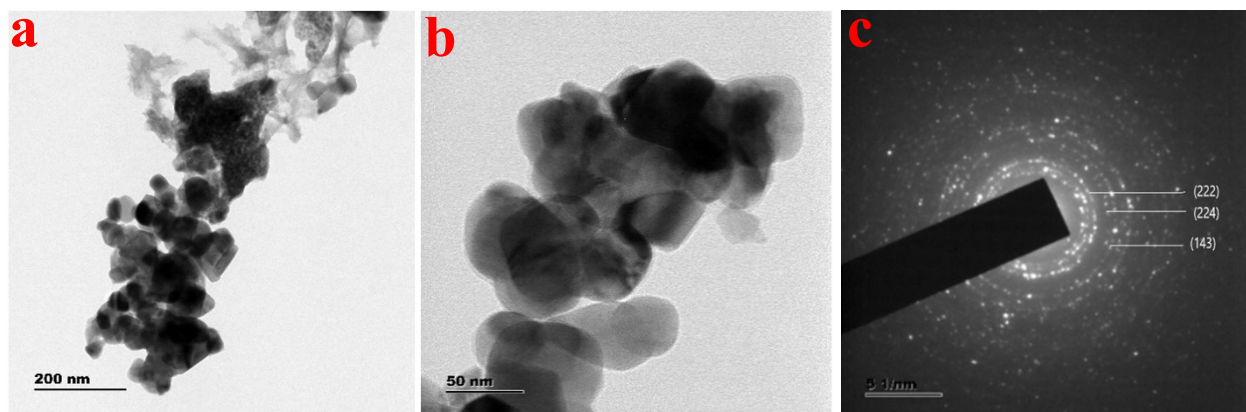

**Fig. S3 (a-b) HRTEM images and (c) SAED pattern of prepared Mn-3 NPs**

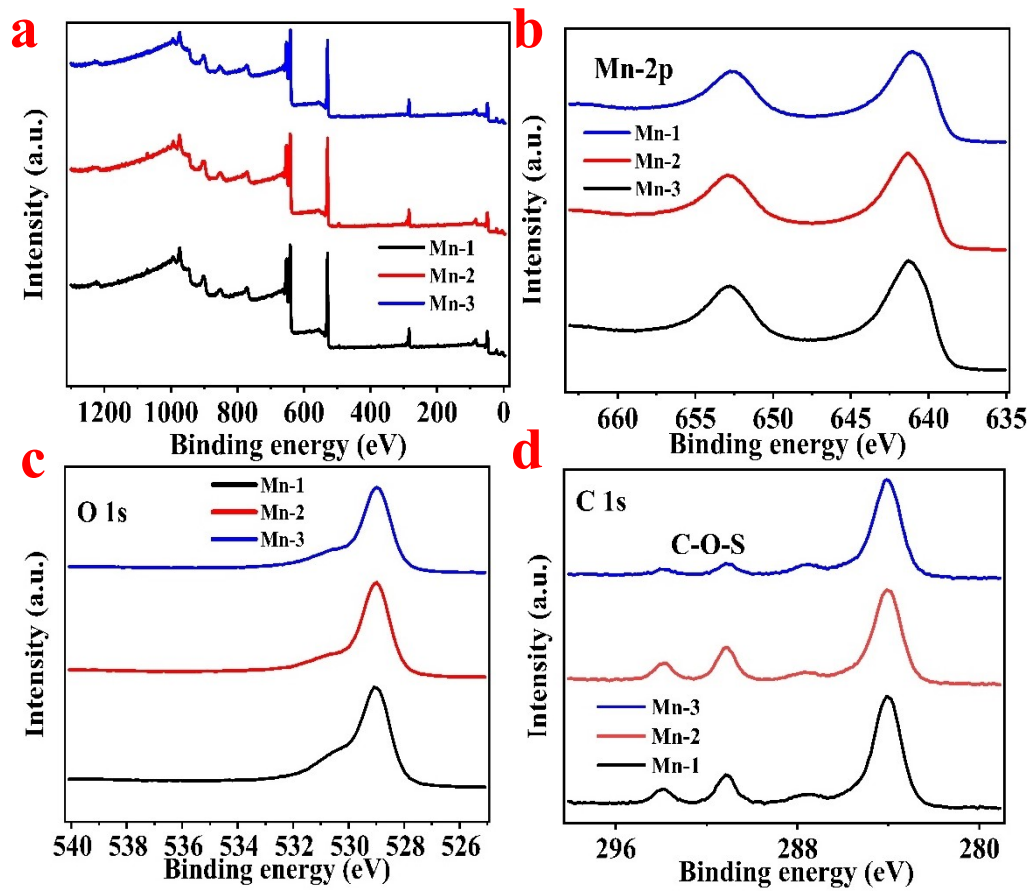

**Fig. S4 depicts the Mn-1, Mn-2, and Mn-3 samples XPS wide scan (a), Mn2p (b), O 1s (c), and C 1s (d) core spectra.**



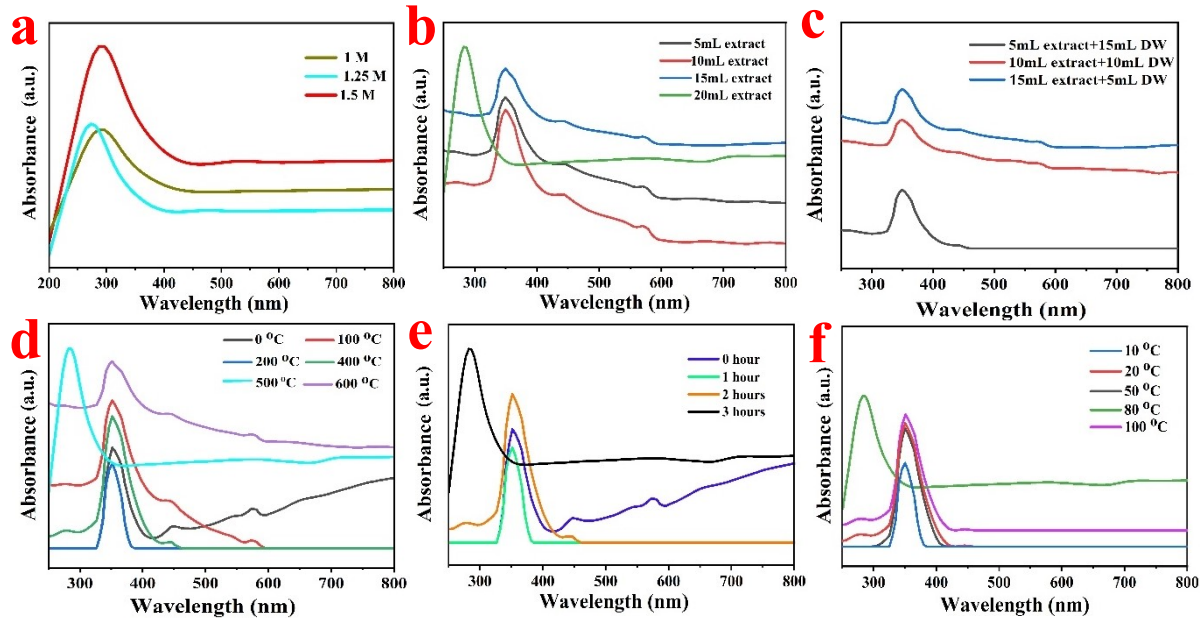

**Fig. S5 Optimization of UV absorption spectra of (a) precursor concentration, (b) leaf extract concentration, (c) dilution of leaf extract, (d) calcination temperature, (e) calcination time and (f) oven temperature variation**

**Table S3: The ZOI of prepared Mn<sub>2</sub>O<sub>3</sub> NPs against the microbial pathogens**

| Microbial pathogen           | Zone of inhibition (mm) |      |      | Control (mm)<br>(Amikacin) |
|------------------------------|-------------------------|------|------|----------------------------|
|                              | Mn-1                    | Mn-2 | Mn-3 |                            |
| <i>Proteus Mirabilis</i>     | 20                      | 20   | 23   | 21                         |
| <i>Aeromonas hydrophilla</i> | 18                      | 20   | 22   | 17                         |
| <i>Aspergillus flaves</i>    | 17                      | 14   | 17   | (Nystatin) 17              |

**Table S4** Comparison of the photocatalytic degradation of various dyes in the presence of metal earth oxide to a previous work sample.

| S. No | Catalyst                                   | Dye              | Irradiation time (min) | Conc. of dye      | Conc. of catalyst (mg) | Dye degradation percentage | Reference |
|-------|--------------------------------------------|------------------|------------------------|-------------------|------------------------|----------------------------|-----------|
| 1     | ZrO <sub>2</sub>                           | MB               | 6 h                    | 100 mL            | 20                     | 57 %                       | 1         |
| 2     | Mn <sub>2</sub> O <sub>3</sub>             | MB               | 6 h                    | 2.5 mg            | 50                     | 71 %                       | 2         |
| 3     | Ag                                         | MB               | 120                    | 100 mL            | 10                     | 72 %                       | 3         |
| 4     | ZnO                                        | MB               | 120                    | 1 mM              | 15                     | 63 %                       | 4         |
| 5     | PVA-ZnO/<br>Mn <sub>2</sub> O <sub>3</sub> | Acid<br>orange-8 | 120                    | 20 ppm            | 60                     | 74 %                       | 5         |
| 6     | ZrO <sub>2</sub>                           | MB               | 5 h                    | 10 ppm            | 25                     | 89 %                       | 6         |
| 7     | Pd                                         | MB               | 90                     | 10 <sup>5</sup> M | 10                     | 81 %                       | 7         |
| 8     | Mn <sub>2</sub> O <sub>3</sub>             | MB               | 120                    | 30 ppm            | 10                     | 81 %                       | Current   |

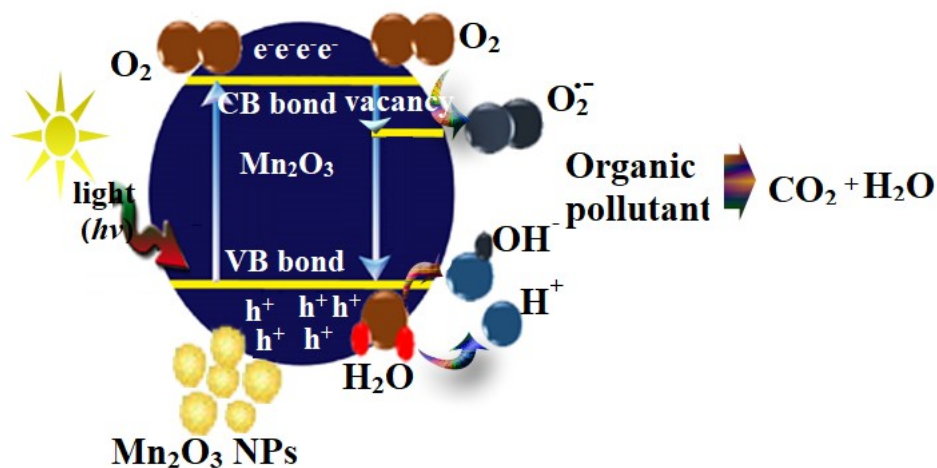

**Fig. S6.** demonstrate the potential photocatalytic dye degradation mechanism

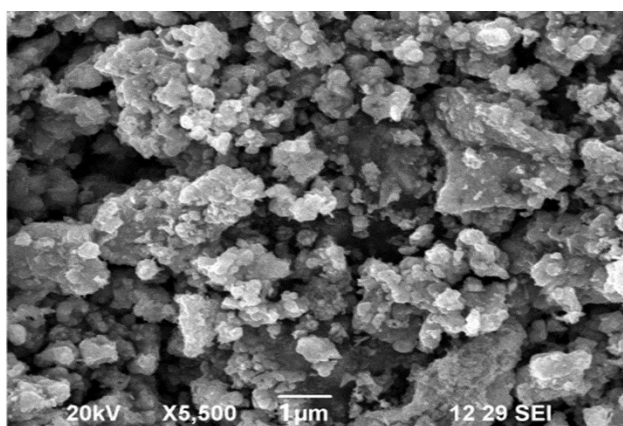

**Fig. S7.** SEM image describing the stability of prepared Mn-3 sample after photocatalytic dye degradation

#### Reference

1. Y. Yuan, Y. Wu, N. Suganthy, S. Shanmugam, K. Brindhadevi, A. Sabour, R. Shanmuganathan, *Food Chem. Toxicol.*, 2022, 168, 113340-113348.
2. M. Pudukudy, Z. Yaakob, *Journal of Nanoparticles*, 2016, 2016,1-8.

3. M. Aravind, A. Ahmad, I. Ahmad, M. Amalanathan, K. Naseem, S. M. M. Mary, M. Zuber, *J. Environ. Chem. Eng.*, 2021, 9, 104877-104906.
4. G. Madhumitha, J. Fowsiya, N. Gupta, A. Kumar, M. Singh, *J. Phys. Chem. Solids*, 2019, 127, 43-51.
5. B. Abebe, E. A. Zereffa, H. A. Murthy, *ACS omega*, 2020, 6, 954-964.
6. R. Vinayagam, B. Singhanian, G. Murugesan, P. S. Kumar, R. Bhole, M. K. Narasimhan, R. Selvaraj, *Environ. Res.*, 2022, 214, 113785-113792.
7. Y. Liang, H. Demir, Y. Wu, A. Aygun, R. N. E. Tiri, T. Gur, Y. Vasseghian, *Chemosphere*, 2022, 306, 135518-135528.
